# Supplementary material for: EFEMP2 indicates assembly of M0 macrophage and more malignant phenotypes of glioma
Source: publisher site journal article supplement (doi:10.18632/aging.103147), 2020-05-12
Supplement: Supplementary file [file aging-v12i9-103147-supplementary-material-SD1.pdf]

## SUPPLEMENTARY FIGURE

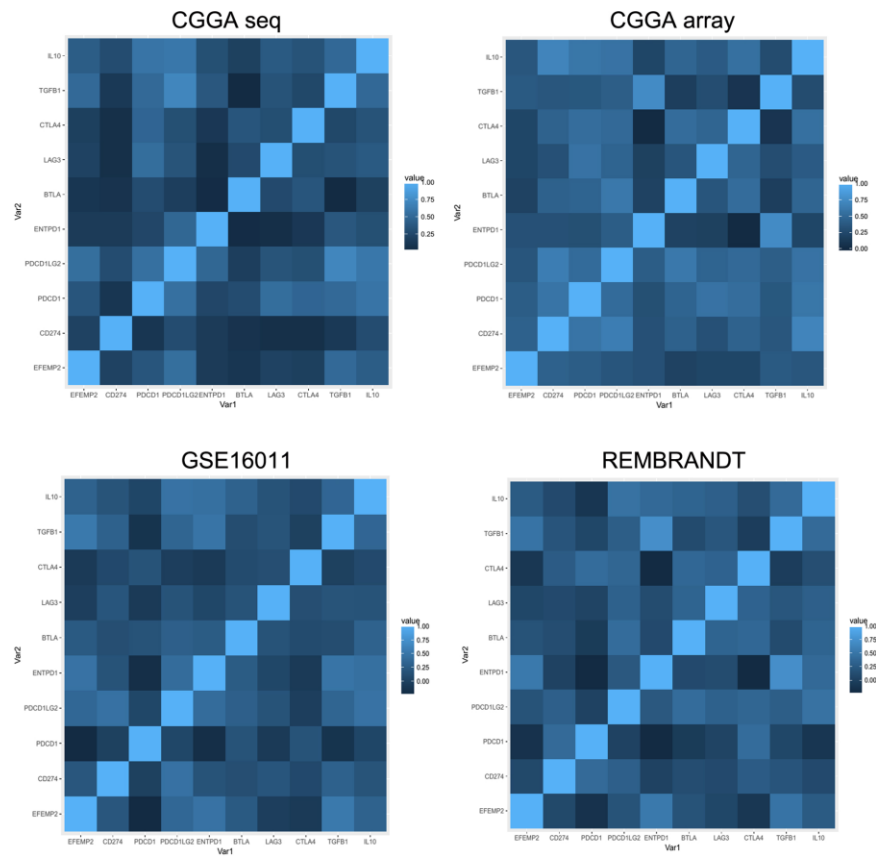

Supplementary Figure 1. Correlation of the expression levels of *EFEMP2* and immune checkpoints.
